# Supplementary material for: Comparative RNA-Seq and Microarray Analysis of Gene Expression Changes in B-Cell Lymphomas of Canis familiaris
Source: PubMed Central journal article supplement (PMC3617154; doi:10.1371/journal.pone.0061088), 2013-04-04
Supplement: pone.0061088.s002.pdf [file pone.0061088.s002.pdf]

**Supplementary Table 1. Summary of canine subjects**

| Responders | Age  | Gender | Breed                        | Stage | Recurrence | Immuno-phenotype   | Best RECIST Response |
|------------|------|--------|------------------------------|-------|------------|--------------------|----------------------|
| RB-07      | 5.75 | F/S    | Boxer                        | IIIa  | Relapsed   | B-cell,<br>MDR Neg | PR                   |
| NE-42      | 9    | M/C    | Labrador Retriever           | Iva   | Naïve      | B-cell,<br>MDR Neg | PR                   |
| NE-41      | 9    | M/C    | Boxer/Pitt Bull Terr.<br>Mix | IVa   | Naïve      | B-cell,<br>MDR Neg | PR                   |
| NE-45      | 9    | M/C    | Golden Retriever             | IIIa  | Naïve      | T-cell,<br>MDR Pos | PR                   |
| FS-25      | 7    | F/S    | Boxer                        | IIIa  | Relapsed   | T-cell,<br>MDR Neg | SD                   |

  

| Non-responders | Age  | Gender | Breed                                  | Stage | Recurrence | Immuno-phenotype   | Best RECIST response |
|----------------|------|--------|----------------------------------------|-------|------------|--------------------|----------------------|
| RB-10          | 5    | M      | Boxer                                  | Va    | Naïve      | B-cell,<br>MDR Neg | SD                   |
| RB-03          | 12.5 | M/C    | Pointer                                | IIIa  | Naïve      | B-cell,<br>MDR Neg | SD                   |
| FS-21          | 4    | F/S    | Pitt Bull Terrier/Lab<br>Retriever Mix | IIIa  | Relapsed   | B-cell,<br>MDR Neg | SD                   |
| RB-16          | 5    | F/S    | Chesapeake Bay<br>Retriever            | IVa   | Naïve      | B-cell, MDR<br>Neg | SD                   |
| FS-22          | 11   | F/S    | Beagle                                 | IIIa  | Relapsed   | T-cell,<br>MDR Neg | SD                   |
