# Supplementary material for: Comparative RNA-Seq and Microarray Analysis of Gene Expression Changes in B-Cell Lymphomas of Canis familiaris
Source: PubMed Central journal article supplement (PMC3617154; doi:10.1371/journal.pone.0061088), 2013-04-04
Supplement: pone.0061088.s003.pdf [file pone.0061088.s003.pdf]

## Supplementary Table 2. Top 20 GSEA gene sets

| <i>Lymphoma Enriched by RNA-Seq v2.5</i>   | <i>Lymphoma Enriched by RNA-Seq v3.0</i>       |
|--------------------------------------------|------------------------------------------------|
| SIG_BCR_SIGNALING_PATHWAY                  | GINESTIER_BREAST_CANCER_ZNF217_AMPLIFIED_DN    |
| HSA04662_B_CELL_RECEPTOR_SIGNALING_PATHWAY | GINESTIER_BREAST_CANCER_20Q13_AMPLIFICATION_DN |
| SHEPARD_GENES_COMMON_BW_CB_MO              | CROONQUIST_IL6_DEPRIVATION_DN                  |
| MANALO_HYPOXIA_DN                          | WELCSH_BRCA1_TARGETS_1_DN                      |
| CELL_CYCLE                                 | NADERI_BREAST_CANCER_PROGNOSIS_UP              |
| CROONQUIST_IL6_STARVE_UP                   | SHEPARD_BMYB_TARGETS                           |
| ZHAN_MM_CD138_PR_VS_REST                   | SIG_BCR_SIGNALING_PATHWAY                      |
| BRENTANI_REPAIR                            | SOTIRIOU_BREAST_CANCER_GRADE_1_VS_3_UP         |
| BRCA1_OVEREXP_DN                           | REN_BOUND_BY_E2F                               |
| P21_P53_MIDDLE_DN                          | KANG_DOXORUBICIN_RESISTANCE_UP                 |
| DOX_RESIST_GASTRIC_UP                      | ROSTY_CERVICAL_CANCER_PROLIFERATION_CLUSTER    |
| P21_P53_ANY_DN                             | SCHLOSSER_MYC_TARGETS_AND_SERUM_RESPONSE_UP    |
| DNA_REPLICATION_REACTOME                   | FRASOR_RESPONSE_TO_SERM_OR_FULVESTRANT_DN      |
| BCRPATHWAY                                 | CROONQUIST_NRAS_SIGNALING_DN                   |
| ADIP_DIFF_CLUSTERS5                        | KEGG_B_CELL_RECEPTOR_SIGNALING_PATHWAY         |
| LI_FETAL_VS_WT_KIDNEY_DN                   | PUJANA_BREAST_CANCER_LIT_INT_NETWORK           |
| CANTHARIDIN_DN                             | REACTOME_DNA_STRAND_ELONGATION                 |
| RIBOSOMAL_PROTEINS                         | REACTOME_DNA_REPAIR                            |
| SIG_PIP3_SIGNALING_IN_B_LYMPHOCYTES        | PASQUALUCCI_LYMPHOMA_BY_GC_STAGE_DN            |
| ST_B_CELL_ANTIGEN_RECEPTOR                 | KAUFFMANN_DNA_REPAIR_GENES                     |
